# Supplementary material
Source: PubMed Central journal article supplement (PMC3324253)
Supplement: supp_blood-2009-07-234211_Document1.pdf [file supp_blood-2009-07-234211_Document1.pdf]

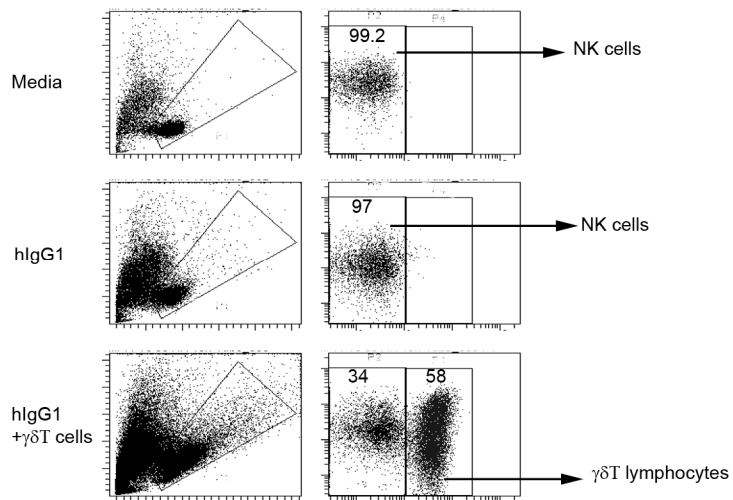

**Figure S1. Gating strategy used in NK cells and  $\gamma\delta$  T lymphocytes coculture**

An example of flow cytometry analysis shows the gating of NK cells and  $\gamma\delta$  T lymphocytes used in all NK activation and cytotoxicity experiments. Purified NK cells were cultured with media, in the presence of plate-immobilized hIgG1 (2.5  $\mu\text{g/ml}$ ) with or without the presence of IPP+IL-2 expanded  $\gamma\delta$  T lymphocytes at 4:1 ratio, after 48h cells were analyzed by flow cytometry. Dot plots represent forward and side scatter of gated T lymphocyte populations. NK cells and  $\gamma\delta$  T lymphocytes were further gated based on  $\text{CD3}^- \text{CD56}^+$  NK cells and  $\text{CD3}^+ \text{CD56}^+$  and  $\text{CD3}^+ \text{CD56}^-$   $\gamma\delta$  T lymphocytes. A representative data from twenty independent experiments is shown.

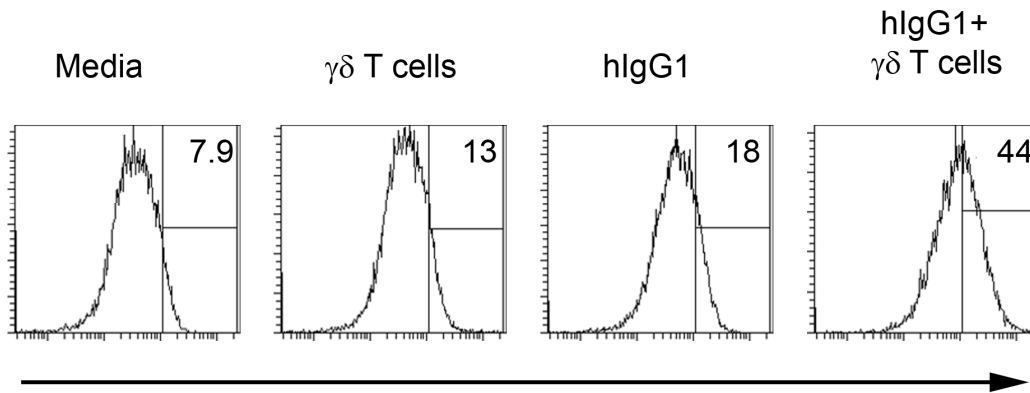

**Figure S2.  $\gamma\delta$  T lymphocytes enhance hIgG1 induced activation of NK cells**

Purified NK cells and IPP+IL-2 expanded  $\gamma\delta$  T cells were co-cultured at 4:1 ratio in the presence or absence of plate-immobilized hIgG1 (2.5  $\mu\text{g/ml}$ ) for 48 hours and the expression of CD54 was analyzed by flow cytometry. Histogram represents gated  $\text{CD3}^- \text{CD56}^+$  NK cells. A representative data from twenty independent experiments is shown.

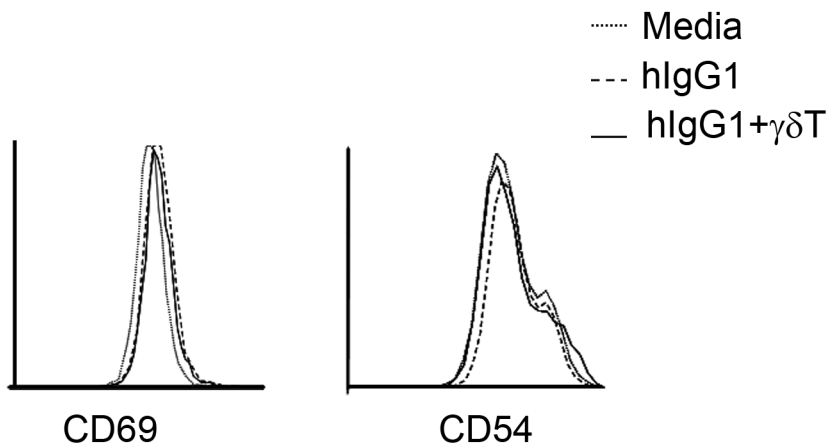

**Figure S3. hIgG1 primed human NK cells fail to induce activation of gamma delta T lymphocytes**

Purified NK cells ( $2 \times 10^5$  cells/well) were cultured with indicated numbers of IPP+IL-2 expanded  $\gamma\delta$  T lymphocytes in a presence of immobilized hIgG1 (2.5  $\mu\text{g/ml}$ ) for 48 hours. Expression of activation markers CD69 and CD54 were assessed by flow cytometry. Overlay of histograms representing gated  $\text{CD3}^+ \gamma\delta \text{TCR}^+$  T lymphocytes. Representative data from one of the ten independent experiments is shown.

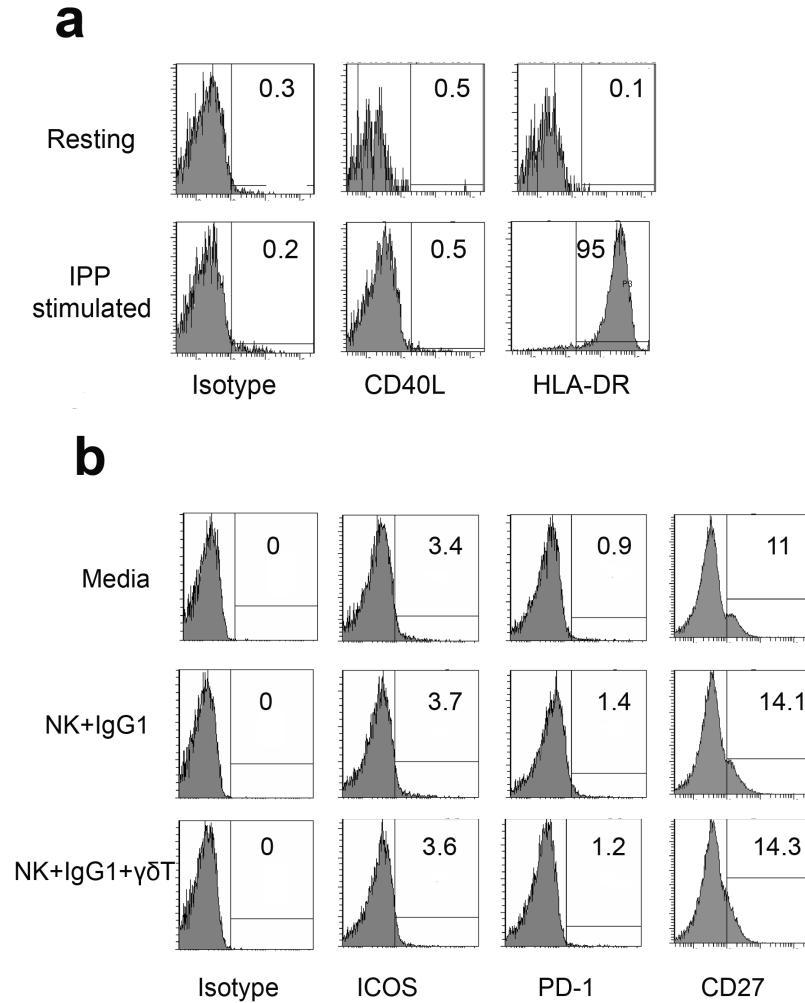

**Figure S4. Expression of costimulatory ligands and receptors on  $\gamma\delta$  T lymphocytes and NK cells**

(A) Fresh  $\gamma\delta$ T lymphocytes from normal donors (top histograms) or  $\gamma\delta$ T lymphocytes expanded in the presence of IPP+IL-2 (lower histograms) were stained with mAb specific for CD40L and HLA-DR. The expression of indicated costimulatory ligands on gated  $CD3^+\gamma\delta TCR^+$  cells is shown. (B) NK cells cultured with media alone or immobilized hIgG1 with or without *in vitro* expanded  $\gamma\delta$  T lymphocytes for 48 h were stained with mAbs specific for ICOS, PD-1, and CD27. Overlay of histograms represents gated NK cells ( $CD3^-CD56^+$ ) are shown. Data are representative of five independent experiments.

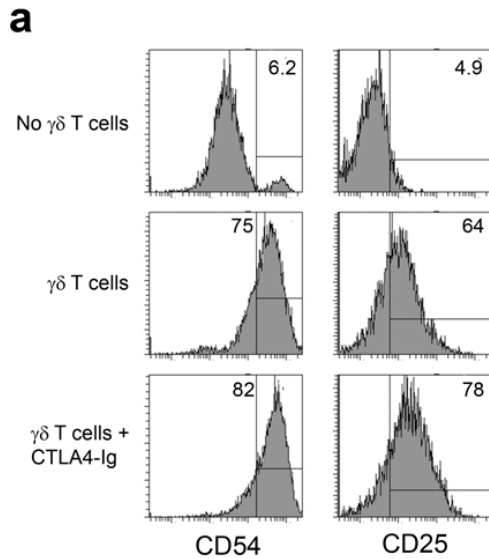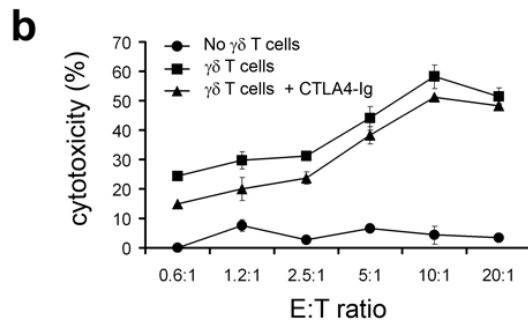

**Figure S5. Blocking of B7-1/CTLA-4 does not inhibit  $\gamma\delta$  T lymphocytes induced activation of NK cells**

(A) Purified NK cells ( $2 \times 10^5$  cells/well) were cultured with indicated numbers of IPP+IL2 expanded  $\gamma\delta$  T lymphocytes in a presence of immobilized hIgG1 (2.5  $\mu\text{g/ml}$ ) or hIgG1 alone for 48 hours. CTLA4-Ig (10  $\mu\text{g/ml}$ ) was added to wells containing NK cells and IPP+IL-2 expanded  $\gamma\delta$  T lymphocytes. After 48 h of culture, cells were stained for CD54 and CD25 expression. The histograms represent gated  $\text{CD3}^- \text{CD56}^+$  NK cells. Data are representative of five independent experiments. (B) Soluble CTLA4-Ig fusion protein (10  $\mu\text{g/ml}$ ) was included during the culture of purified NK cells and  $\gamma\delta$  T lymphocytes (4:1 ratio) in hIgG1 pre-coated plates for 48 hours. Cytotoxicity of NK cells repurified using magnetic beads was analyzed in a standard 4 hour  $^{51}\text{Cr}$ -release assay against TU167 SCCHN cell line. Data are presented as mean $\pm$ SD of triplicate samples and representative of five independent experiments.

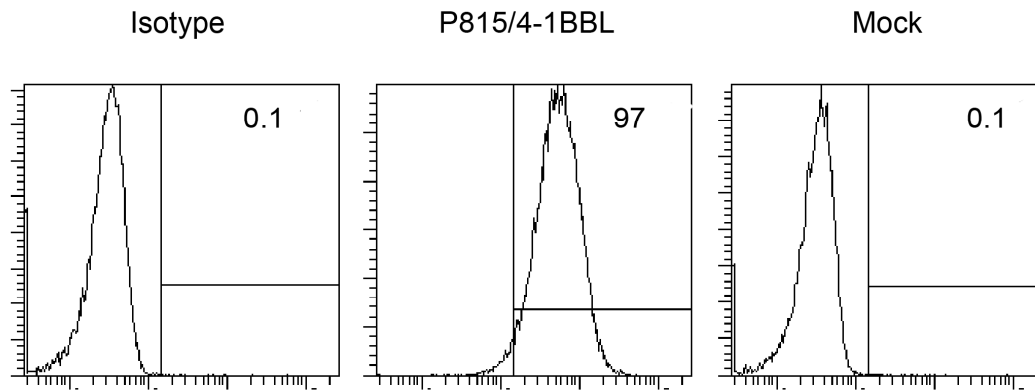

**Figure S6. Characterization of P815/4-1BBL cells**

P815/4-1BBL and mock cells ( $1 \times 10^6$  cells) were stained with anti-4-1BBL for 30 min and the expression of 4-1BBL was assessed by flow cytometry. Histogram represents gated p815 cells either expressing 4-1BBL or mock, isotype matched control was included for staining. A representative data from one of the five independent experiments is shown.

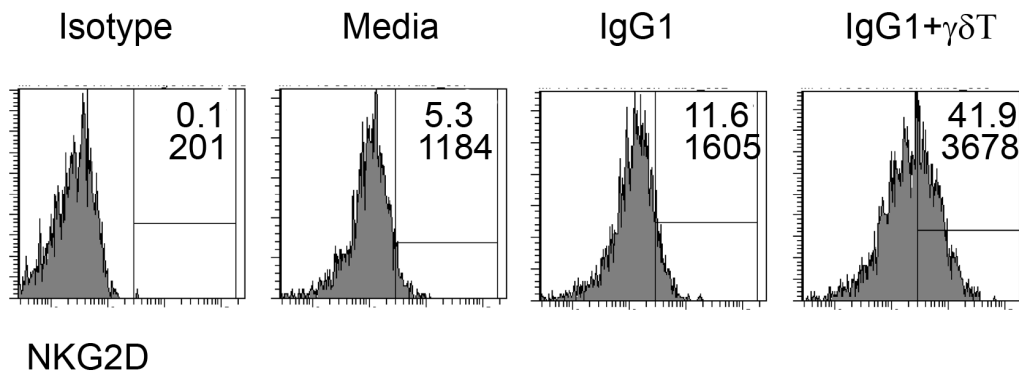

**Figure S7.  $\gamma\delta$  T lymphocytes coculture with NK cells results in enhanced NKG2D expression**

NK cells cultured with media alone or immobilized hIgG1 with or without *in vitro* expanded  $\gamma\delta$  T lymphocytes (4:1). After 48 hours of culture, the expression of NKG2D was assessed on NK cells. Histogram represent NKG2D expression on gated  $CD3^-CD56^+$  NK cells. Percentage of NKG2D expression and MFI of NKG2D expression were presented, isotype matched antibody staining was included as negative control. A representative data from one of the ten independent experiments is shown.

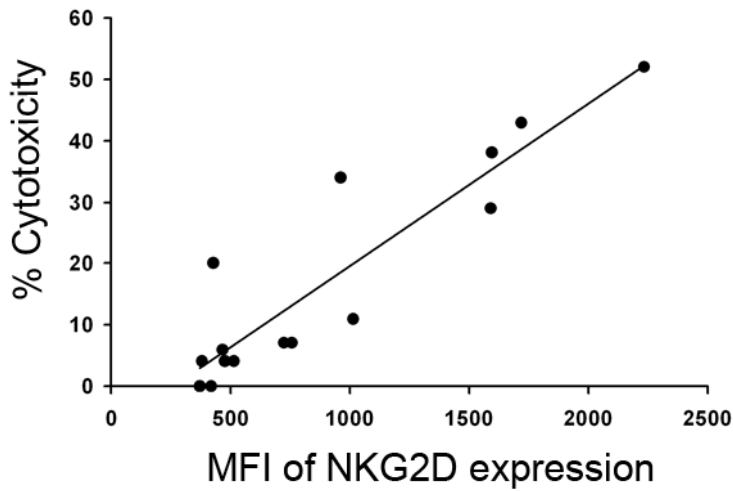

**Figure S8. Correlation between NK cells NKG2D expression and in vitro cytolytic activity against HNSSC tumor**

NK cells purified from PBMC of 15 individual donors were co-cultured in the presence of media alone, on plates pre-coated with hIgG1 with or without expanded  $\gamma\delta$  T lymphocytes (4:1 ratio). After 48 h of culture, NK cells from media alone or IgG1 primed NK cells and NK cells repurified from  $\gamma\delta$  T lymphocyte coculture were tested for the cytolytic activity in a standard 4 h  $^{51}\text{Cr}$ -release assay against indicated tumor targets. Graph is plotted as percentage of specific HNSSC tumor (Tu 167) killing against MFI of NKG2D expression. Linear coefficient comparing trend of all individuals,  $R^2 = 0.82$ .

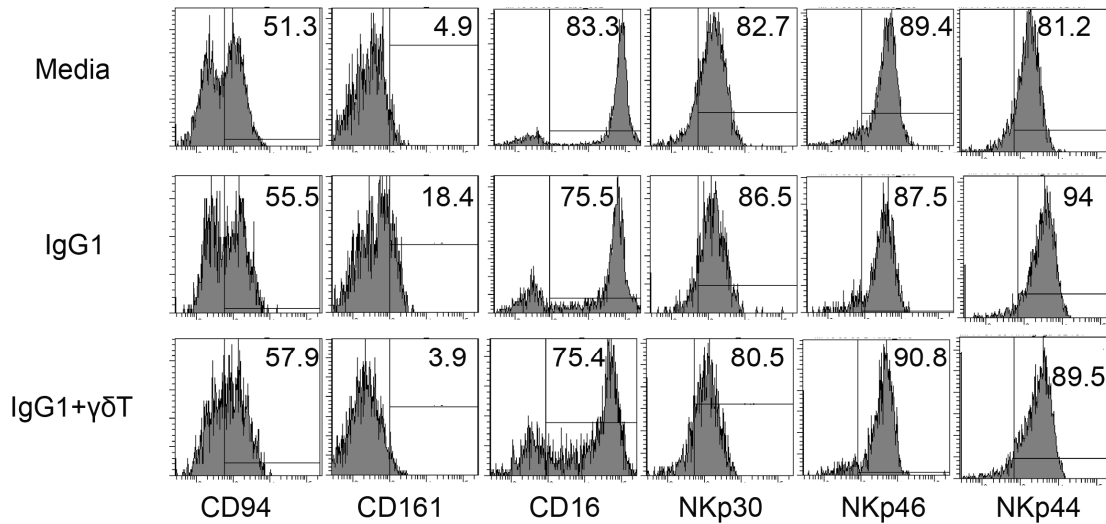

**Figure S9. Regulation of NK receptors expression by  $\gamma\delta$  T lymphocytes**

NK cells cultured with media alone or immobilized hIgG1 with or without *in vitro* expanded  $\gamma\delta$  T lymphocytes for 48 hours were stained for the classical NK activating and inhibitory receptors as CD16, NKp30, NKp46, NKp44, CD94, CD161 and analysed by Flow cytometry. Histogram represents CD3<sup>-</sup>CD56<sup>+</sup> NK cells. A representative experiment from five is shown.

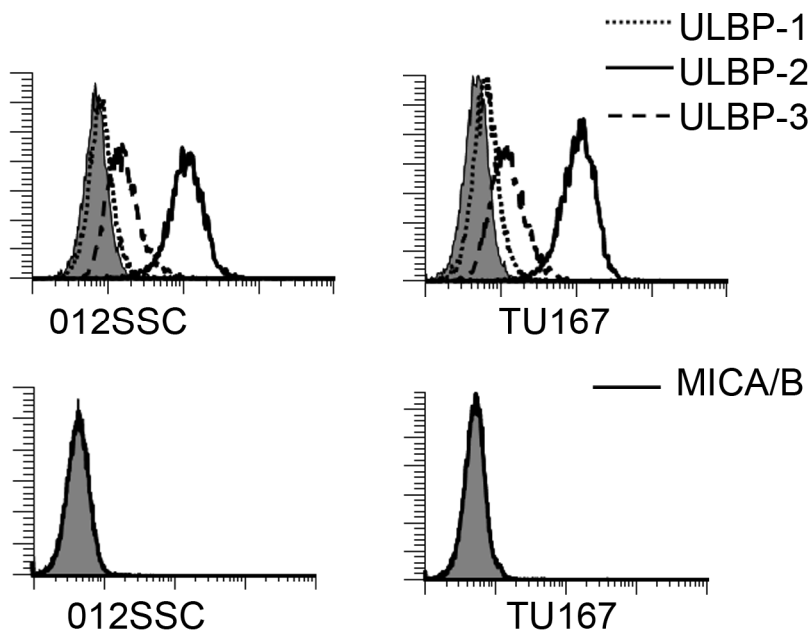

**Figure S10. SSCHN cells express ligands for NKG2D**

SSCHN cells ( $1 \times 10^6$  cells) were stained for NKG2D ligands i.e ULBPs and MICA/B for 30 min and the expression of ULBPs and MICA/B were assessed by flow cytometry. Histogram were gated on 012SSC or TU167 tumor cells expressing ULBPs or MICA/B, isotype matched control (Gray filled histogram) was included for staining. A representative data from one of the five independent experiments is shown.
